# Supplementary material for: Abscisic Acid Metabolism in Leaves and Roots of Four Vitis Species in Response to Water Deficit
Source: Research Square preprint supplement (doi:10.21203/rs.3.rs-289346/v1), 2021-03-15
Supplement: Supplementary file 1 [file 26131618061112e6ae28a5fa.xlsx]

## Sheet: Sheet1
Additional File 11: Physiological measurements performed on rapid dehydration leaves. Stem water potential [Ψstem (Mpa)], solute pressure [Ψs (Mpa)], turgor pressure [Ψp (Mpa)], stomatal conductance [Gs (mol H2O·m-2 ·s-1)], photosynthesis [Ps (µmol·m-2 ·s-1)], and water content (%) averaged for all times and genotypes for Control (Ctrl) and WD (mean ± SE). Three-way ANOVA p-values displayed (p-va…
Measurement	Avg. Ctrl ± SEM	Avg. WD ± SEM	Treatment	Time	Genotype
Ψstem (Mpa)	-0.540 ± 0.072	-1.76 ± 0.064	P < 2x10-16 (***)	P = 0.526 (n/s)	P = 0.235 (n/s)
Ψs (Mpa)	-1.097 ± 0.036	-1.323 ± 0.0359	P < 2.69x10-6 (***)	P = 0.0618 (n/s)	P < 0.004 (**)
Ψp (Mpa)	0.636 ± 0.051	0.062 ± 0.0237	P < 2x10-16 (***)	P = 0.387 (n/s)	P < 0.015 (*)
Gs (mol H2O·m-2 ·s-1)	0.187 ± 0.021	0.0188 ± 0.0005	P < 1.09x10-13 (***)	P = 0.087 (n/s)	P < 0.008 (**)
Ps (µmol·m-2 ·s-1)	6.833 ± 0.482	1.382 ± 0.307	P < 2x10-16 (***)	P < 0.040 (*)	P < 0.016 (*)
Water content (%)	92.303 ± 0.760	79.479 ± 0.846	P < 2x10-16 (***)	P < 0.004 (**)	P < 0.0004 (***)
