# Supplementary material for: Abscisic Acid Metabolism in Leaves and Roots of Four Vitis Species in Response to Water Deficit
Source: Research Square preprint supplement (doi:10.21203/rs.3.rs-289346/v1), 2021-03-15
Supplement: Supplementary file 2 [file f2c94312469da07c2691fc94.xlsx]

## Sheet: Antibody_sequence
Additional File 9: antiNCED3 sequences and target information. antiNCED3 target gene name, target size (kD), target sequence, and target sequence length (AA). Cys- indicates a non-coding cysteine added for production purposes.
Antibody	Target_ID	Target_Kda	peptide_seq	peptide_length
antiNCED3.1	VIT_19s0093g00550	67.14	CRFTETQRLIQERDFGRPVFPK	22
antiNCED3.2	VIT_19s0093g00550	67.14	Cys-RLNLKTGKSTRRPILPESE	20
antiNCED3.3	VIT_19s0093g00550	67.14	Cys-KLPSRVPYGFHGTFISSKELEKQA	25

## Sheet: Antibody_%ID_to_CS_NCEDs
Additional File 9: antiNCED3 percent identity to CS NCEDs. Each antibody was individually MUSCLE aligned against each CS NCED protein sequence to determine any off target binding the antibodies may have.
CS	V1	V2	Annotation	length	kD	Perc_ID_antiNCED3.1	Perc_ID_antiNCED3.2	Perc_ID_antiNCED3.3
VvCabSauv08_H0037F_017.ver1.0.g141040	Vitvi10g00821	VIT_10s0003g03750	NCED5	605	67.32	86.36	84.21	75
VvCabSauv08_H0100F_007.ver1.0.g203160	Vitvi05g00963	VIT_05s0051g00670	NCED6	575	62.98	68.18	57.89	62.5
VvCabSauv08_H0110F_001.ver1.0.g209500	Vitvi02g01288	VIT_02s0087g00930	NCED4	589	65.61	36.36	57.89	56.52
VvCabSauv08_H0110F_001.ver1.0.g209510	Vitvi02g01286	VIT_02s0087g00910	NCED4	599	65.91	31.82	57.89	47.83
VvCabSauv08_H0127F_005.ver1.0.g221190	Vitvi19g01356	VIT_19s0093g00550	NCED3	610	67.21	100	100	100
VvCabSauv08_P0037F.ver1.0.g404590	Vitvi10g00821	VIT_10s0003g03750	NCED5	605	67.42	86.36	84.21	75
VvCabSauv08_P0100F.ver1.0.g489890	Vitvi05g00963	VIT_05s0051g00670	NCED6	575	62.88	68.18	57.89	62.5

## Sheet: Antibody_%ID_genomes
Additional File 9: antiNCED3 percent identity to each other and NCED3 in CS, RI, and PN40024 genomes. Each antibody was aligned against each CS, RI, and PN40024 NCED3 protein sequences and the other antiNCED3s to confirm reliability across Vitis species and uniqueness. Percent identity (ID) is reported. Yellow corresponds to high (>90% ID) and red corresponds to 0% ID.
	PN40024	antiNCED3.3	antiNCED3.1	CS	antiNCED3.2	RI
PN40024	100	100	100	99	100	99
antiNCED3.3		100	0	100	0	100
antiNCED3.1			100	100	0	100
CS				100	100	99
antiNCED3.2					100	100
RI						100

## Sheet: Antibody_linear_detection
Additional File 9: antiNCED3.1 and antiNCED3.2 mix linear detection range. A mix of samples covering all treatments, organs, and species was run using 4, 8, 10, 15, 20, 30, 35, 50, 55, 70, and 100 ng total protein extract (depending on sample availbility). Each sample was run in duplicate (separate gel and membrane per technical replicate). Majority of samples were saturated on the membrane image…
A)
